# Supplementary material for: Continuous and discontinuous transitions between two types of capillary bridges on a beaded chain pulled out from a liquid
Source: Royal Society of Chemistry journal article supplement (doi:10.1039/c7sm00396j), 2017-01-01
Supplement: c7sm00396j5.pdf [file c7sm00396j5.pdf]

# Continuous and discontinuous transitions between two types of capillary bridges on a beaded chain pulled out from a liquid.

Filip Dutka, Zbigniew Rozynek, and Marek Napiórkowski

## Supplementary Movie Captions

**Supplementary Movie 1.** The process of pulling the chain of spheres with radius  $R = 2\text{ mm}$  out of the 10cSt silicone oil with the vertical velocity  $v = 0.01\text{ mm/s}$ . The sphere-planar liquid surface bridge transforms into the sphere-sphere bridge continuously. The chain was assembled by gluing the spheres together. Section of the video frame (700px x 620px) was used to measure the projected area  $S$  of the spheres and liquid onto a plane parallel to the  $z$  axis which was then used in making the inset in Fig. 6.

**Supplementary Movie 2.** The process of pulling the chain of spheres with radius  $R = 25\text{ }\mu\text{m}$  out of the 10cSt silicone oil with the vertical velocity  $v = 0.01\text{ mm/s}$ . The sphere-planar liquid surface bridge transforms into the sphere-sphere bridge discontinuously. The chain was assembled by employing the alternating electric field. Section of the video frame (300px x 250px) was used to measure the projected area  $S$  of the spheres and liquid onto a plane parallel to the  $z$  axis which was then used in making the inset in Fig. 6.

**Supplementary Animation 1.** The process of pulling the chain of spheres with radius  $R = 2\text{ mm} > \lambda/2$ , where the capillary length  $\lambda = 1.45\text{ mm}$ . The sphere-planar liquid surface bridge transforms into the sphere-sphere bridge continuously. This animation is based on our theoretical analysis and corresponds to Supplementary Movie 1.

**Supplementary Animation 2.** The process of pulling the chain of spheres with radius  $R = 25\text{ }\mu\text{m} < \lambda/2$ , where the capillary length  $\lambda = 1.45\text{ mm}$ . The sphere-planar liquid surface bridge transforms into the sphere-sphere bridge discontinuously. This animation is based on our theoretical analysis and corresponds to Supplementary Movie 2.
